# Supplementary material
Source: PubMed Central journal article supplement (PMC2366843)
Supplement: mbc_E06-10-0937_1.pdf [file mbc_E06-10-0937_1.pdf]

## Supplemental Figure Legends

**Supplemental Figure 1.** Subcellular distribution of Arfp is not affected by overexpression of Sec7p-DsRed in wild-type cells used for microscopy in Figure 5A. Distribution of endogenous Arfp was evaluated by subcellular fractionation from wild-type (CSY349) and *pik1-101*(CSY906) cells used in Figure 5A. Strains were transformed with plasmid pCS136 and grown to mid-log phase in selective medium. Cells were then homogenized and soluble and membrane fractions were separated by centrifugation of a postnuclear supernatant at 100,000xg. A temperature shift to 37°C was performed for 1 h prior to fractionation when indicated. Equal volumes of fractions were analyzed by SDS-PAGE and immunoblotting. Note that the distribution of Arf is the same in wild-type cells expressing an additional copy of Sec7p-DsRed under the control of a strong promoter and *pik1-101* cells containing genomically tagged Sec7p-DsRed.

**Supplemental Figure 2.** Ultrastructural analysis of *gga1Δ* cells. Yeast cells (CSY914) were grown to log phase, cryo-immobilized, processed for freeze-substitution at -90°C for 2d in acetone with 1% osmium tetroxide and 0.1% uranyl acetate and viewed in a TECNAI 12 (FEI) transmission electron microscope. Elongated structures typical for this mutant are indicated with arrowheads. Scale bars represent (A) 500 nm (B) 250 nm.

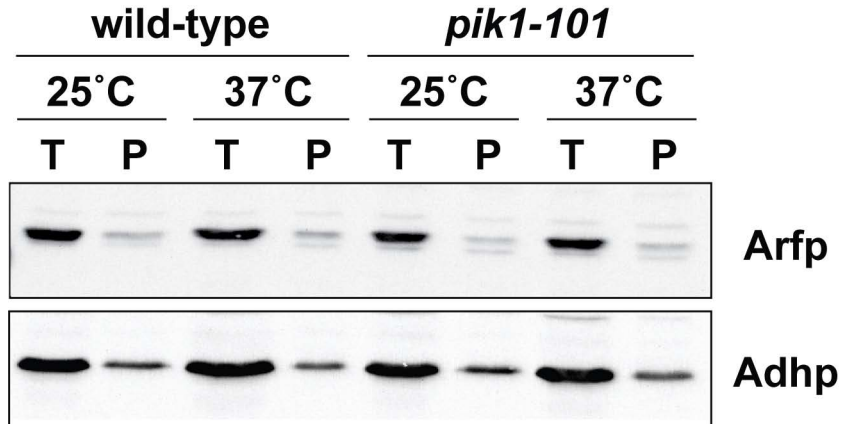

Supplemental Figure 01

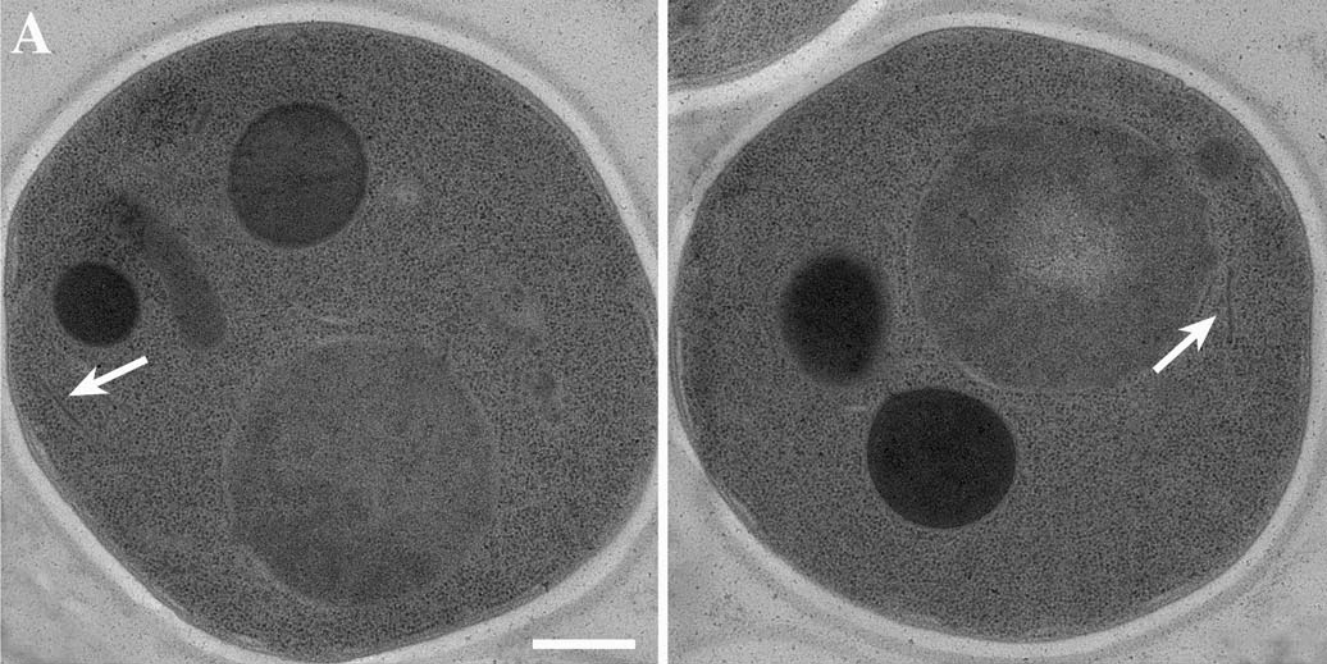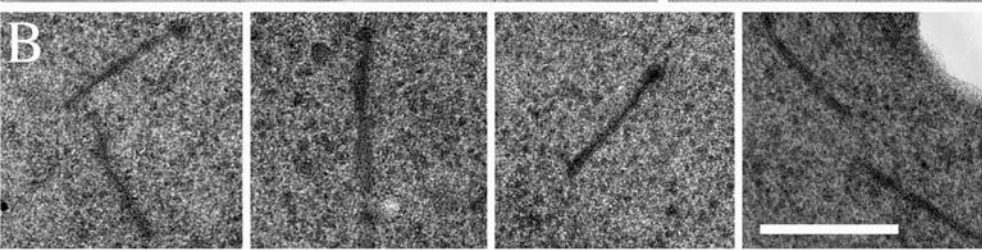

Supplemental Figure 02

## Supplementary Methods

### Genetic and DNA manipulations

The *pik1-101* query mutation was linked to a *URA3* selectable marker. A subgroup of identified mutants was confirmed by tetrad analysis. The query strain CSY544 was generated in several steps. First pMB108 was constructed by cloning a fragment containing the *PIK1* ORF±500 bp into the BLUESCRIPT II (KS+) vector digested with *Bam*HI and *Not*I. pMB196 and pMB197 were cloned by insertion of the *PIK1* ORF±500 bp or the *pik1-101* mutant ORF±500 bp respectively into pT3T7BM digested with *Bam*HI and *Not*I. A 3.7-kb fragment containing the *PIK1* open reading frame (ORF) and 500 bp upstream sequence was removed from pMB108 by first digesting with *Bsp*EI, blunting with Klenow fragment and afterwards digesting with *Hind*III leaving a 3.3-kb fragment of pMB108 containing the 500 bp downstream sequence of the *PIK1* open reading frame. This fragment was ligated to a 1.1-kb fragment containing the *URA3* ORF isolated from YEp24 by digestion with *Sma*I and *Hind*III generating pMB265. A 1.5-kb fragment containing the *URA3* ORF and the 500 bp *PIK1* downstream sequence was isolated from pMB265 by digesting with *Hind*III, blunting with Klenow-fragment and digesting with *Not*I. This 1.5-kb fragment was inserted into pMB197 previously digested with *Pac*I, blunted with Klenow polymerase and then cut with *Not*I. The resulting construct pMG2 was digested with *Bam*HI and *Not*I generating a fragment containing 500 bp *PIK1* upstream sequence, the *pik1-101* open reading frame, 178 bp *PIK1* downstream sequence containing the *PIK1* terminator region, the *URA3* ORF and 500 bp *PIK1* downstream sequence. This fragment was transformed into Y3656. Transformants were selected for growth on SC-URA medium (integration of *URA3* ORF) and tested for temperature-sensitive growth on YPD at 37°C (*pik1-101* mutation). Correct integration of the fragment was verified by PCR using isolated genomic DNA from

positive transformants as the template. Synthetic genetic array (SGA) analysis was performed in parallel using a query strain with the *PIK1* wild-type allele as reference (CSY549). This reference strain was generated as described for CSY544, with the difference that the 1.5-kb fragment isolated from pMB265 was inserted into pMB196 instead of pMB197 generating pMG3.

### **Subcellular fractionation**

For subcellular fractionation, 35 ODu of washed cells were resuspended in 1 ml 50 mM K-phosphate pH 7.5, 1.4 M sorbitol, 0.4% (v/v)  $\beta$ -mercaptoethanol, 0.1 mg/ml zymolase-100T, and incubated for 45 min at 37°C. The sample was cooled down on ice and centrifuged through a sorbitol cushion (50 mM K-phosphate pH 7.5, 1.7 M sorbitol, Complete) in a 15 ml Falcon tube (12 min, 3,000xg). The spheroplasts were resuspended in 1 ml lysis buffer containing 20 mM TEA pH 7.2, 0.8 M sorbitol, 125 mM KAc, 2.5 mM MgAc, 1 mM DTT, complete, 1 mM PMSF, 5  $\mu$ M pepstatin, 1 mM ATP, 1 mM GTP, 5 mM creatine phosphate, 10  $\mu$ g/ml creatine kinase, homogenized by 50 strokes in a glass-teflon homogenizer (Braun-Melsungen) and cleared by two centrifugation steps of 1,000xg for 3 min. 20  $\mu$ l of the lysate were kept as 'input sample' and 500  $\mu$ l of lysate were spun for 45 min at 100,000xg in a Beckman Optima Ultracentrifuge (TLA120.2 rotor).

### **Liposome recruitment assay**

For liposome recruitment assays, PC, PE, PS and cholesterol were mixed in a molar ratio of 44:33:11:11 (in chloroform/ methanol solution) and phosphoinositides were added to 1% molar ratio (in chloroform/ methanol solution). The solvent was evaporated to dryness under a stream of nitrogen and resuspended in 'liposome

buffer' (15.4 mM citric acid, 69.2 mM dibasic sodium phosphate, pH 6.4). The unilamellar liposomes were adjusted to a size of 400 nm.

The liposome recruitment assay was performed in a total of 200  $\mu$ l in 'recruitment buffer' (25 mM HEPES-KOH pH 7.25, 125 mM potassium acetate, 2.5 mM magnesium acetate, 1 mM DTT, protease inhibitors, 3 mM di-sodium hydrogenphosphate, 5 mM glycerol-2-phosphate). 25  $\mu$ l liposomes (stock: 1.25  $\mu$ mol) were incubated at 37°C for 30 min with recombinant myristoylated human hARF1 (30  $\mu$ g/l) {Franco, 1995 #114} and 0.5  $\mu$ g GST or 1.5  $\mu$ g GST-Gga2p/ GST-Gga2p<sup>VHS-GAT</sup>, respectively. When indicated, GTP $\gamma$ S was added to a final concentration of 0.1 mM. Liposomes were spun down at 13,000xg for 30 min at 4°C, washed once with ice-cold 'recruitment buffer' and again recovered by centrifugation. Membrane pellets were analyzed by SDS-PAGE and immunoblotting.

**Table S1.** Genes showing synthetic sick/lethal interaction with *pik1-101*

| ORF <sup>a</sup>        | gene <sup>b</sup>          | function <sup>c</sup>     |                        |                 |
|-------------------------|----------------------------|---------------------------|------------------------|-----------------|
| <i>VPS1</i>             | <i>YKR001C</i>             | membrane trafficking      | confirmed <sup>d</sup> | SL <sup>e</sup> |
| <i>VPS9</i>             | <i>YML097C</i>             | membrane trafficking      | confirmed              | SS              |
| <i>RIC1</i>             | <i>YLR039C</i>             | membrane trafficking      | confirmed              | SS/SL           |
| <i>YPT6</i>             | <i>YLR261C<sup>f</sup></i> | membrane trafficking      | confirmed              | SS              |
| <i>VPS51</i>            | <i>YKR020W</i>             | membrane trafficking      | confirmed              | SL              |
| <i>VPS54</i>            | <i>YDR027C</i>             | membrane trafficking      | confirmed              | SL              |
| <i>GGA2</i>             | <i>YHR108W</i>             | membrane trafficking      | confirmed              | SS              |
| <i>YPT31</i>            | <i>YER031C</i>             | membrane trafficking      | confirmed              | SL              |
| <i>SAC6</i>             | <i>YDR129C</i>             | cytoskeleton organization | confirmed              | SS/SL           |
| <i>CLA4</i>             | <i>YNL298W</i>             | cytoskeleton organization | confirmed              | SS              |
| <i>RRD1</i>             | <i>YIL153W</i>             | cytoskeleton organization | not confirmed          | SS              |
| <i>CIK1</i>             | <i>YMR198W</i>             | cytoskeleton organization | not confirmed          | SS              |
| <i>PDF1</i>             | <i>YGL179W</i>             | cytoskeleton organization | not confirmed          | SS              |
| <i>URM1</i>             | <i>YIL008W</i>             | urmylation                | confirmed              | SS              |
| <i>UBA4<sup>g</sup></i> | <i>YHR111W</i>             | urmylation                | confirmed              | SS              |
| <i>NCS2</i>             | <i>YNL119W</i>             | urmylation                | confirmed              | SS              |
| <i>ELP2</i>             | <i>YGR200C</i>             | urmylation                | confirmed              | SS              |
| <i>YNL120C</i>          | <i>YNL120C</i>             | urmylation <sup>h</sup>   | confirmed              | SS              |
| <i>LIP5</i>             | <i>YOR196C</i>             | lipid metabolism          | not confirmed          | SS              |
| <i>SPE1</i>             | <i>YKL184W</i>             | lipid metabolism          | not confirmed          | SS              |
| <i>POR1</i>             | <i>YNL055C</i>             | mitochondrial function    | not confirmed          | SS              |
| <i>ODC1</i>             | <i>YPL134C</i>             | mitochondrial function    | not confirmed          | SS              |
| <i>OCT1</i>             | <i>YKL134C</i>             | mitochondrial function    | not confirmed          | SS              |
| <i>MRP10</i>            | <i>YDL045W-A</i>           | mitochondrial function    | not confirmed          | SS              |
| <i>MRP20</i>            | <i>YDR405W</i>             | mitochondrial function    | not confirmed          | SS              |

|                |                  |                                                  |               |    |
|----------------|------------------|--------------------------------------------------|---------------|----|
| <i>MRPL10</i>  | <i>YNL284C</i>   | mitochondrial function                           | not confirmed | SS |
| <i>MRPL38</i>  | <i>YKL170W</i>   | mitochondrial function                           | not confirmed | SS |
| <i>ATP11</i>   | <i>YNL315C</i>   | mitochondrial function                           | not confirmed | SS |
| <i>ATP12</i>   | <i>YJL180C</i>   | mitochondrial function                           | not confirmed | SS |
| <i>MTF1</i>    | <i>YMR228W</i>   | mitochondrial function                           | not confirmed | SS |
| <i>SWF5</i>    | <i>YOR333C</i>   | mitochondrial function                           | not confirmed | SS |
| <i>ASC1</i>    | <i>YMR116C</i>   | ribosomal protein                                | not confirmed | SS |
| <i>RPS11A</i>  | <i>YDR025W</i>   | ribosomal protein                                | not confirmed | SS |
| <i>RPS16B</i>  | <i>YDL083C</i>   | ribosomal protein                                | not confirmed | SS |
| <i>RPL12A</i>  | <i>YEL054C</i>   | ribosomal protein                                | not confirmed | SS |
| <i>RPL19A</i>  | <i>YBR084C-A</i> | ribosomal protein                                | not confirmed | SS |
| <i>RPL24A</i>  | <i>YGL031C</i>   | ribosomal protein                                | not confirmed | SS |
| <i>RPL40A</i>  | <i>YIL148W</i>   | ribosomal protein                                | not confirmed | SS |
| <i>RPL1B</i>   | <i>YGL135W</i>   | ribosomal protein                                | not confirmed | SS |
| <i>RPL29</i>   | <i>YFR032C-A</i> | ribosomal protein                                | not confirmed | SS |
| <i>VMA2</i>    | <i>YBR127C</i>   | vacuolar H <sup>+</sup> -ATPase subunit          | not confirmed | SS |
| <i>VMA7</i>    | <i>YGR020C</i>   | vacuolar H <sup>+</sup> -ATPase subunit          | not confirmed | SS |
| <i>VMA13</i>   | <i>YPR036W</i>   | vacuolar H <sup>+</sup> -ATPase subunit          | confirmed     | SL |
| <i>VPH2</i>    | <i>YKL119C</i>   | vacuolar H <sup>+</sup> -ATPase assembly protein | not confirmed | SS |
| <i>YOL138C</i> | <i>YOL138C</i>   | carbohydrate metabolism                          | not confirmed | SS |
| <i>TPS1</i>    | <i>YBR126C</i>   | carbohydrate metabolism                          | not confirmed | SS |
| <i>PFK1</i>    | <i>YGR240C</i>   | carbohydrate metabolism                          | not confirmed | SS |
| <i>GID8</i>    | <i>YMR135C</i>   | carbohydrate metabolism                          | not confirmed | SS |
| <i>LPD1</i>    | <i>YFL018C</i>   | carbohydrate metabolism                          | not confirmed | SS |
| <i>PKR1</i>    | <i>YMR123W</i>   | unknown                                          | confirmed     | SS |
| <i>SOV1</i>    | <i>YMR066W</i>   | unknown                                          | not confirmed | SS |
| <i>MEH1</i>    | <i>YKR007W</i>   | unknown                                          | not confirmed | SS |
| <i>PSP2</i>    | <i>YML017W</i>   | unknown                                          | not confirmed | SS |
| <i>FYV1</i>    | <i>YDR024W</i>   | unknown                                          | not confirmed | SS |
| <i>YEL048C</i> | <i>YEL048C</i>   | unknown                                          | confirmed     | SS |
| <i>YMR010W</i> | <i>YMR010W</i>   | unknown                                          | confirmed     | SS |



|                  |                  |                    |               |    |
|------------------|------------------|--------------------|---------------|----|
| <i>YMR119W-A</i> | <i>YMR119W-A</i> | unknown            | not confirmed | SS |
| <i>YNL296W</i>   | <i>YNL296W</i>   | unknown            | not confirmed | SS |
| <i>YNL235C</i>   | <i>YNL235C</i>   | unknown            | not confirmed | SS |
| <i>YOR318C</i>   | <i>YOR318C</i>   | unknown            | not confirmed | SS |
| <i>YHL005C</i>   | <i>YHL005C</i>   | unknown            | not confirmed | SS |
| <i>YFL006W</i>   | <i>YFL006W</i>   | unknown            | not confirmed | SS |
| <i>YKL118W</i>   | <i>YKL118W</i>   | unknown            | not confirmed | SS |
| <i>GDA1</i>      | <i>YEL042W</i>   | other <sup>i</sup> | confirmed     | SS |
| <i>SMI1</i>      | <i>YGR229C</i>   | other              | confirmed     | SS |
| <i>LYP1</i>      | <i>YNL268W</i>   | other              | not confirmed | SS |
| <i>DEG1</i>      | <i>YFL001W</i>   | other              | not confirmed | SS |
| <i>SWI4</i>      | <i>YER111C</i>   | other              | not confirmed | SS |
| <i>CNB1</i>      | <i>YKL190W</i>   | other              | not confirmed | SS |
| <i>LSM1</i>      | <i>YGL124C</i>   | other              | not confirmed | SS |
| <i>TRM9</i>      | <i>YML014W</i>   | other              | not confirmed | SS |
| <i>LSM7</i>      | <i>YNL147W</i>   | other              | not confirmed | SS |
| <i>SRP40</i>     | <i>YKR092C</i>   | other              | not confirmed | SS |
| <i>SLX8</i>      | <i>YER116C</i>   | other              | not confirmed | SS |
| <i>SMF1</i>      | <i>YOL122C</i>   | other              | not confirmed | SS |
| <i>TIP41</i>     | <i>YPR040W</i>   | other              | not confirmed | SS |
| <i>CNE1</i>      | <i>YAL058W</i>   | other              | not confirmed | SS |
| <i>DFG16</i>     | <i>YOR030W</i>   | other              | not confirmed | SS |
| <i>HAT2</i>      | <i>YEL056W</i>   | other              | not confirmed | SS |
| <i>SRB8</i>      | <i>YCR081W</i>   | other              | not confirmed | SS |
| <i>URA1</i>      | <i>YKL216W</i>   | other              | not confirmed | SS |
| <i>ZRT3</i>      | <i>YKL175W</i>   | other              | not confirmed | SS |
| <i>ALR2</i>      | <i>YFL050C</i>   | other              | not confirmed | SS |
| <i>SGF73</i>     | <i>YGL066W</i>   | other              | not confirmed | SS |
| <i>RIM9</i>      | <i>YMR063W</i>   | other              | not confirmed | SS |
| <i>MSC1</i>      | <i>YML128C</i>   | other              | not confirmed | SS |

This table shows all genes isolated by SGA analysis whose deletion results in sickness or lethality of double mutants with *pik1-101*

<sup>a</sup> Selected ORF name according to SGD ([www.yeastgenome.org](http://www.yeastgenome.org)) annotation.

<sup>b</sup> Systematic gene name according to SGD ([www.yeastgenome.org](http://www.yeastgenome.org)) annotation.

<sup>c</sup> The functional grouping of genes is based on description in YPD ([www.incyte.com](http://www.incyte.com))/SGD ([www.yeastgenome.org](http://www.yeastgenome.org)) and/or published data.

<sup>d</sup> Selected genetic interactions were confirmed by tetrad analysis.

<sup>e</sup> growth phenotype of double mutants: SL-synthetic lethal; SS-synthetic sick.

<sup>f</sup> *VPS63* ORF overlaps to 98% with *YPT6* ORF.

<sup>g</sup> *UBA4* was not originally identified by SGA analysis but was found to exhibit synthetic sick interaction with *pik1-101* in the further course of this study.

<sup>h</sup> *YNL120C* overlaps with *NCS2*.

<sup>i</sup> Gene function annotated by YPD ([www.incyte.com/](http://www.incyte.com/)) / SGD ([www.yeastgenome.org](http://www.yeastgenome.org)) and/or published data does not fall into any of the above categories.

**Table S2.** Ultrastructural analysis of membranes accumulating in *pik1-101* and *gga2Δ* mutants

| Structures                              | <i>pik1-101</i> <sup>a</sup> | <i>gga2Δ</i> <sup>a</sup> | <i>gga1Δ</i> <sup>a</sup> |
|-----------------------------------------|------------------------------|---------------------------|---------------------------|
| A/F. Rings/Berkeley bodies <sup>b</sup> | 60                           | 24                        | 4                         |
| B. Double rings                         | 8                            | -                         | -                         |
| C. Tubular structures                   | 54                           | 22                        | 74                        |
| D. Multilayered structures              | <5                           | -                         | -                         |
| E. MVB <sup>c</sup> like structures     | <5                           | -                         | -                         |
| F. Fragmented vacuoles                  | yes                          | yes                       | -                         |
| A. Aberrant vacuoles                    | 28                           | 2                         | -                         |

<sup>a</sup>Counts represent number of cells of a total of 100 containing the corresponding structure

<sup>b</sup>Tlg1p positive structures

<sup>c</sup>Multivesicular bodies

*pik1-101* (CSY712), *gga2Δ* (CSY909), *gga1Δ* (CSY914)

---

**Table S3.** GenBank accession numbers

---

| <b>ORF</b>     | <b>GenBank accession number</b> |
|----------------|---------------------------------|
| HsGga1         | NP_037497.1                     |
| XtGga1         | NP_001016968.1                  |
| DrGga1         | NP_001004000.1                  |
| DmGga1         | NP_572571.1                     |
| HsGga2         | NP_055859.1                     |
| XtGga2         | NP_001016968.1                  |
| SsGga2         | DY704086.1                      |
| HsGga3         | NP_619525.1                     |
| XtGga3         | CX928298.1                      |
| DrGga3         | XP_698317.1                     |
| SpSPBC25H2.16c | NP_596351.1                     |
| SpSPAC1F3.05   | NP_593008.1                     |
| ScGga1         | NP_010645.1                     |
| ScGga2         | NP_011976.1                     |
| HsTOM1         | NP_005479.1                     |
| XtTOM1         | NP_001016770.1                  |
| DrTOM1         | AAH56566.1                      |
| DmTOM1         | NP_648315.1                     |
| ENTH Epsin     | 1H0A                            |
| ANTH CALM      | 1HFA                            |

---

**Table S4.** *S.cerevisiae* strains used in this study

| Strain | Genotype                                                                                   | Reference              |
|--------|--------------------------------------------------------------------------------------------|------------------------|
| BY4741 | MATa <i>his3Δ1 leu2Δ0 met15Δ0 ura3Δ0</i>                                                   | Euroscarf <sup>a</sup> |
|        | MATa <i>his3Δ1 leu2Δ0 met15Δ0 ura3Δ0 orfΔ::kanMX4</i>                                      | Euroscarf              |
| CSY209 | MATa <i>ura3Δ0 leu2Δ0 his3Δ1 met15Δ0</i>                                                   | Euroscarf              |
| CSY210 | MATa <i>ura3Δ0 leu2Δ0 his3Δ1 lys2Δ0</i>                                                    | Euroscarf              |
| CSY349 | MATa <i>ura3-52 leu2-3,112 trp1-289::TRP-SEC7-DsRED.T4</i>                                 | This study             |
| CSY391 | CSY544 <i>vps10Δ::VPS10-3xHA-kanMX6</i>                                                    | This study             |
| CSY392 | CSY210 <i>vps10Δ::VPS10-3xHA-kanMX6</i>                                                    | This study             |
| CSY398 | CSY544 <i>gga2Δ::kanMX4 VPS10-3xHA-HIS3</i>                                                |                        |
| CSY399 | CSY544 <i>vps28Δ::kanMX4 VPS10-3xHA-HIS3</i>                                               | Euroscarf              |
| CSY544 | MATa <i>can1Δ::MFA1pr-HIS3-MFα1pr-LEU2 PIK1::pik1-101-URA3 ura3Δ0 his3Δ0 leu2Δ0 lys2Δ0</i> | This study             |
| CSY545 | MATa <i>PIK1::pik1-101-URA gga2Δ::kanMX4 ura3Δ0 his3Δ0 leu2Δ0 lys2Δ0</i>                   | This study             |
| CSY549 | MATa <i>can1Δ::MFA1pr-HIS3-MFα1pr-LEU2 PIK1-URA3 ura3Δ0 his3Δ0 leu2Δ0 lys2Δ0</i>           | This study             |
| CSY561 | CSY544 <i>chs6Δ::kanMX4</i>                                                                | This study             |
| CSY566 | BY4741 <i>chs6Δ::kanMX4</i>                                                                | Euroscarf              |
| CSY567 | BY4741 <i>gga2Δ::kanMX4</i>                                                                | Euroscarf              |
| CSY704 | BY4741 <i>arf1Δ::kanMX4</i>                                                                | Euroscarf              |
| CSY712 | MATa <i>pik1-101 ura3-52 leu2-3,112</i>                                                    | This study             |
| CSY900 | CSY210 <i>vps28Δ::kanMX4 VPS10-3xHA-HIS3</i>                                               | This study             |
| CSY902 | CSY210 <i>vps28Δ::kanMX4</i>                                                               | Euroscarf              |
| CSY901 | NY1211 <i>sec7Δ::Sec7-DsRED-kanMX6</i>                                                     | This study             |
| CSY904 | BY4741 <i>sst1Δ::kanMX4</i>                                                                | Euroscarf              |
| CSY906 | CSY712 <i>sec7Δ::Sec7-DsRED-kanMX6</i>                                                     | This study             |
| CSY908 | CSY210 <i>alp4Δ::kanMX4</i>                                                                | Euroscarf              |
| CSY909 | MATa <i>ura3-52 leu2-3,112 gga2Δ::kanMX4</i>                                               | This study             |
| CSY911 | BY4741 <i>vps34::kanMX4</i>                                                                |                        |
| CSY914 | MATa <i>ura3-52 leu2-3,112 his3Δ200 gga1Δ::HIS3</i>                                        | This study             |
| NY1175 | MATa <i>ura3-52 leu2-3,112 trp1-289</i>                                                    | Novick lab             |
| NY1211 | MATa <i>ura3-52 leu2-3,112 his3Δ200</i>                                                    | Novick lab             |
| NY1295 | MATa <i>sec6-4 ura3-52 leu2-3,112</i>                                                      | Novick lab             |
| NY604  | MATa <i>ura3-52 leu2-3,112</i>                                                             | Novick lab             |

|           |                                                                                                                                                                                                                                                 |            |
|-----------|-------------------------------------------------------------------------------------------------------------------------------------------------------------------------------------------------------------------------------------------------|------------|
| NY778     | MAT $\alpha$ <i>sec6-4 ura3-52 leu2-3,112</i>                                                                                                                                                                                                   | Novick lab |
| Y3656     | MAT $\alpha$ <i>can1<math>\Delta</math>::MFA1pr-HIS3-MF<math>\alpha</math>1pr-LEU2 ura3<math>\Delta</math>0 his3<math>\Delta</math>1 leu2<math>\Delta</math>0 lys2<math>\Delta</math>0</i>                                                      | C. Boone   |
| YAB200897 | MAT $\alpha$ <i>ade 2<math>\Delta</math>:: hisG his3<math>\Delta</math>200 leu2<math>\Delta</math>0 met15<math>\Delta</math>0 ura3<math>\Delta</math>0 trp1<math>\Delta</math>63</i>                                                            | A. Boman   |
| YAB531    | MAT $\alpha$ <i>ade2<math>\Delta</math>::hisG his 3<math>\Delta</math>200 leu2<math>\Delta</math>0 met15<math>\Delta</math>0 trp1<math>\Delta</math>63 ura3<math>\Delta</math>0 gga1<math>\Delta</math>::His3</i>                               | A. Boman   |
| YAB532    | MAT $\alpha$ <i>ade2<math>\Delta</math>::hisG his 3<math>\Delta</math>200 leu2<math>\Delta</math>0 met15<math>\Delta</math>0 trp1<math>\Delta</math>63 ura3<math>\Delta</math>0 gga2<math>\Delta</math>::His3</i>                               | A. Boman   |
| YAB538    | MAT $\alpha$ <i>ade2<math>\Delta</math>::hisG his 3<math>\Delta</math>200 leu2<math>\Delta</math>0 met15<math>\Delta</math>0 trp1<math>\Delta</math>63 ura3<math>\Delta</math>0 gga1<math>\Delta</math>::TRP1 gga2<math>\Delta</math>::His3</i> | A. Boman   |

---

<sup>a</sup> European *Saccharomyces cerevisiae* Archives for Functional analysis, <http://web.uni-frankfurt.de/fb15/mikro/euroscarf/index.html>
